# Supplementary material for: Obesity Enhances Disease Severity in Female Mice Following West Nile Virus Infection
Source: PubMed Central journal article supplement (PMC8439568; doi:10.3389/fimmu.2021.739025), 2021-08-31

**A**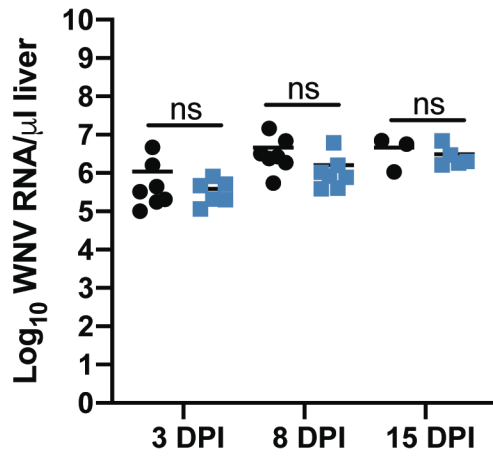**B**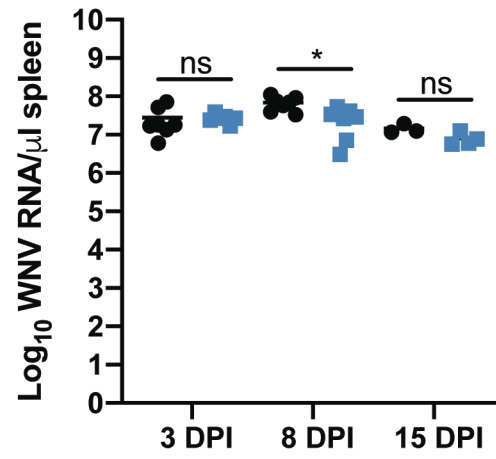**C**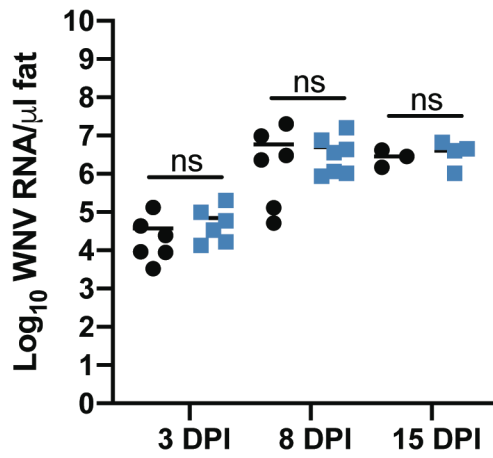**D**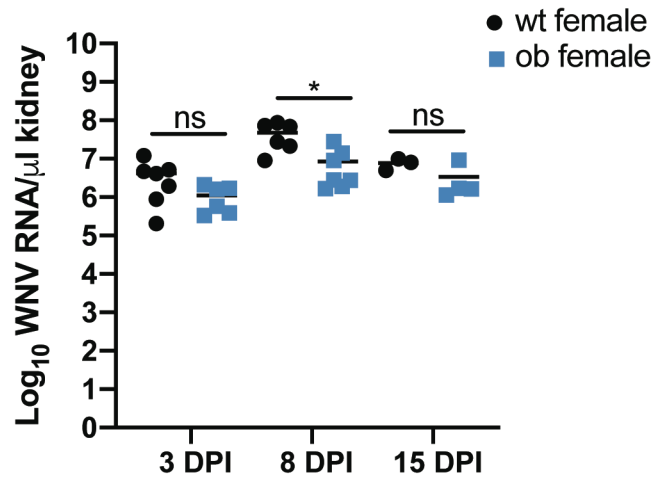

Supplement: Image_1.pdf [file Image_1.pdf]
