# Supplementary material for: Obesity Enhances Disease Severity in Female Mice Following West Nile Virus Infection
Source: PubMed Central journal article supplement (PMC8439568; doi:10.3389/fimmu.2021.739025), 2021-08-31

**8 DPI****A**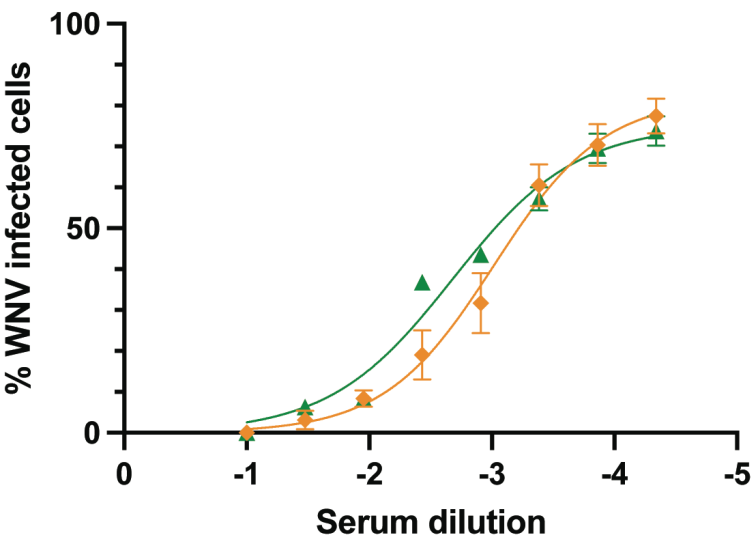**B**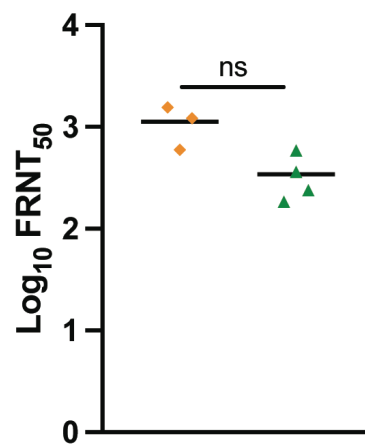**C**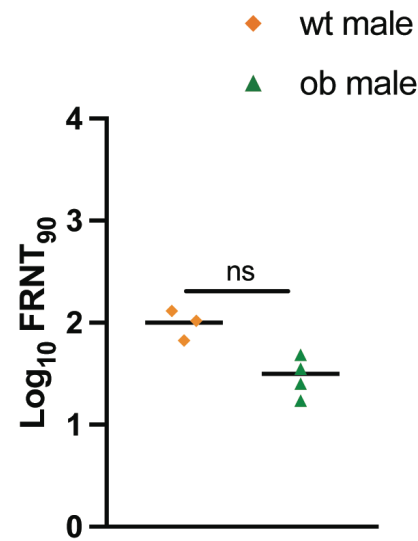**15 DPI****D**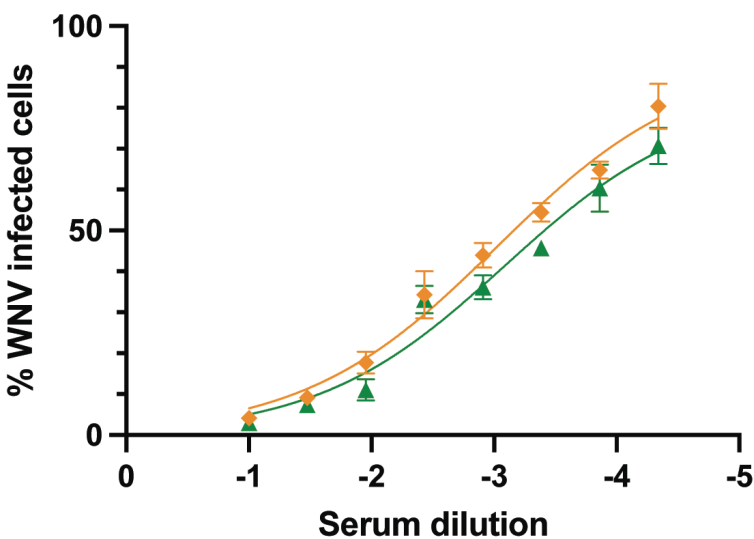**E**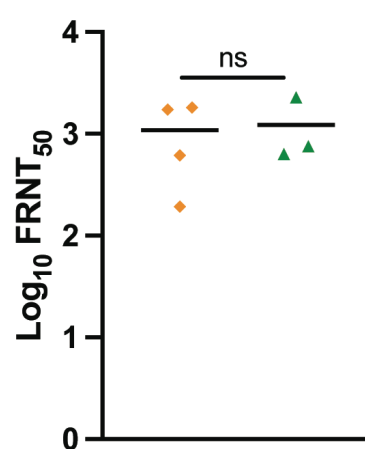**F**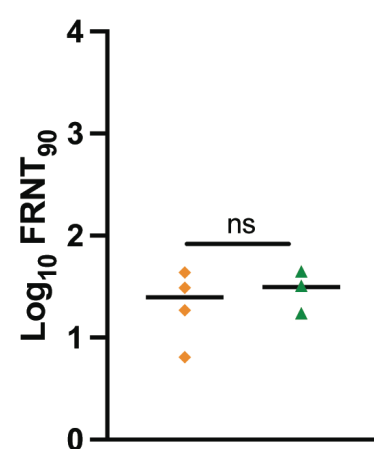**30 DPI****G**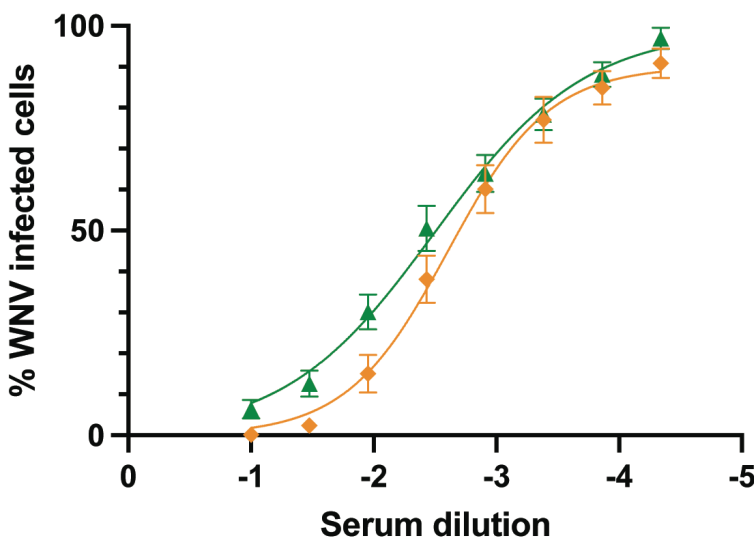**H**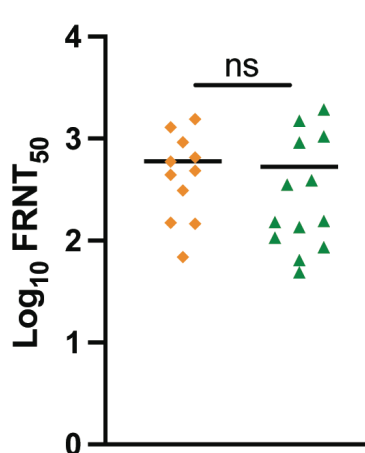**I**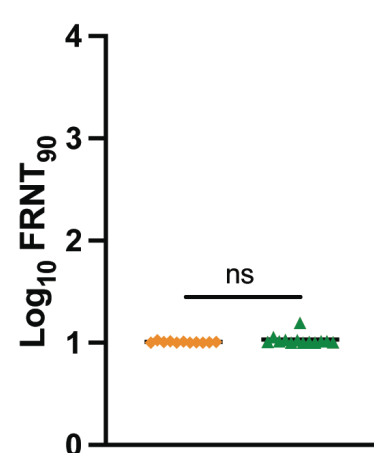

Supplement: Image_4.pdf [file Image_4.pdf]
